## CD38 is a good predictor of anti-PD-1 immunotherapy responsiveness in hepatocellular carcinoma

1 Siting Goh <sup>1^</sup>, Harry Ho Man Ng <sup>2^</sup>, Valerie Chew<sup>2,3,4</sup>, Xin Ni Sim <sup>1,5</sup>, Huihua Li <sup>6,7</sup>, Sherlly Lim<sup>1</sup>,  
2 Jeffrey Chun Tatt Lim <sup>1,8</sup>, Josh Jie Hua Loh <sup>1</sup>, Khin Sabai <sup>1</sup>, Clara Chong Hui Ong <sup>1</sup>, Tracy Loh <sup>1</sup>,  
3 Wei Qiang Leow <sup>1</sup>, Joycelyn Lee Jie Xin <sup>9</sup>, Han Chong Toh <sup>9</sup>, Fabio Malavasi <sup>10</sup>, David Wai Meng  
4 Tai <sup>9</sup>, Ser Yee Lee <sup>2,11</sup>, Pierce Chow <sup>2,11</sup>, Evan Newell <sup>4</sup>, Su Pin Choo <sup>9</sup>, Joe Yeong <sup>1,4,8,\*</sup> and Tony  
5 Kiat Hon Lim<sup>1,\*</sup>

6 <sup>1</sup>Division of Pathology, Singapore General Hospital, Singapore

7 <sup>2</sup>Duke-NUS Medical School, Singapore

8 <sup>3</sup>SingHealth Translational Immunology and Inflammation Centre (STIIC), Singapore Health  
9 Services Pte Ltd, Singapore,

10 <sup>4</sup> Singapore Immunology Network (SIgN), Agency of Science, Technology and Research (A\*STAR),  
11 Singapore

12 <sup>5</sup>Temasek Polytechnic, Singapore

13 <sup>6</sup>Division of Medicine, Singapore General Hospital, Singapore

14 <sup>7</sup>Centre for Quantitative Medicine, Duke-NUS Medical School, Singapore

15 <sup>8</sup> Institute of Molecular Cell Biology (IMCB), Agency of Science, Technology and Research  
16 (A\*STAR), Singapore

17 <sup>9</sup> Division of Medical Oncology, National Cancer Centre Singapore, Singapore

18 <sup>10</sup> Laboratory of Immunogenetics and CeRMS, Department of Medical Sciences, University of  
19 Torino, Torino, Italy

20 <sup>11</sup>Department of Hepatopancreatobiliary and Transplant Surgery, Singapore General Hospital,  
21 Singapore

22 <sup>^</sup> Contributed equally

23

24 **\*Correspondence to:**

25 Dr. Joe Yeong

26 [joe.yeong.p.s@sgh.com.sg](mailto:joe.yeong.p.s@sgh.com.sg);

27 Prof. Tony Lim Kiat Hon

28 [lim.kiat.hon@singhealth.com.sg](mailto:lim.kiat.hon@singhealth.com.sg)

29

30 **Abstract**

31 Hepatocellular carcinoma (HCC) is the fourth leading cause of cancer-associated mortality in the  
32 world. However, with the associated low five-year survival and high recurrence rates, alternative  
33 treatment modalities specifically immunotherapy have been researched. A correlation between  
34 CD38<sup>+</sup> tumour-infiltrating leukocyte (TIL) density and improved prognosis was found in a recent  
35 study. However, studies relating to CD38 expression in immune infiltrates within tumours are limited.  
36 In the present study, we confirmed the expression of CD38 on macrophages in HCC and determined  
37 the relationship between CD38<sup>+</sup> leukocytes and lymphocytes and patient response to immunotherapy.  
38 Using immunohistochemistry, we analysed tissue samples obtained from 20 patients from Singapore  
39 with HCC prior to immunotherapy. Tumour infiltrating leukocytes expression within tumour were  
40 correlated to the responsiveness of patients to immunotherapy.

41 Expression of CD38 was found within the tumour cells and surrounding immune infiltrates including  
42 lymphocytes and macrophages. We then ask whether CD38 expression by the distinct cell  
43 populations may acquire theranostic relevance. Patients with higher level of CD38<sup>+</sup> immune infiltrate  
44 subsets had significantly better response to anti-PD-1 immunotherapy, and this is also true for CD38<sup>+</sup>  
45 lymphocytes within the tumour microenvironment. In particular, a cut-off of 13.0% positive out of  
46 total leukocytes and 12.4% positive out of total lymphocytes is found to be of strong predictive value  
47 of responsiveness to immunotherapy treatment, thus a strong theranostic impact is seen by using  
48 CD38 as a biomarker for anti-PD-1 therapy.

49 The establishment of an association between CD38 expression and the response to anti-PD-1  
50 immunotherapy in HCC, could be applied to a larger cohort outside Singapore. These may eventually  
51 change the routine testing in clinical practice to identify HCC patients suitable for immunotherapy.

52

## **CD38 is a good predictor of anti-PD-1 immunotherapy responsiveness in HCC**

53 **Keywords: macrophage; CD38; marker; immunotherapy; responsiveness; cancer;**  
54 **hepatocellular carcinoma**

## 55 1 Introduction

56 Hepatocellular carcinoma (HCC) is the fifth and ninth most frequently diagnosed cancer in adult  
57 males and females, respectively,<sup>1</sup> and is ranked as the fourth leading cause of cancer-associated  
58 mortality in the world. Cirrhosis is a major risk factor for HCC, and this is often caused by chronic  
59 hepatitis B or C infection. Surgical resection and liver transplantation are curative therapeutic options  
60 for early-stage HCC. However, five-year survival rates following surgical resection for early stage  
61 disease remain relatively low (17%-53%), with a recurrence rate as high as 70%.<sup>2-4</sup>

62 Currently, the first-line therapy for advanced HCC is oral Sorafenib and Lenvantinib<sup>5, 6</sup>. They are  
63 both oral multi-kinase inhibitor (MKI), capitalizing on vasoendothelial growth factor (VEGF)  
64 inhibition for HCC. Although, these have largely prolonged the survival of patients, a large  
65 proportion of patients diagnosed with intermediate and advanced stage HCC still reported a median  
66 overall survival of 21.1 months<sup>6</sup> and 10.7 months<sup>7</sup> respectively in large randomized trials. Thereby  
67 highlighting the necessity of other options to treat refractive advanced HCC patients.

68 Besides VEGF inhibition with oral MKI, PD-1/PDL-1 and CTLA-4 inhibition has emerged as an  
69 exciting therapeutic strategy in systemic armamentarium for HCC. Immunotherapy utilising  
70 checkpoint blockade antibodies has delivered promising results in diseases such as melanoma<sup>8</sup> and  
71 lung cancer<sup>9</sup>. This has led to FDA approval for treatments using monoclonal antibodies, including  
72 nivolumab, ipilimumab, pembrolizumab, and atezolizumab, against specific checkpoint molecules,  
73 such as cytotoxic T-lymphocyte-associated antigen 4 (CTLA-4), programmed cell death protein-1  
74 (PD-1) and programmed death-ligand 1 (PD-L1).

75 The efficacy and safety of nivolumab, which targets PD-1, have been explored in a phase I/II trial  
76 (CheckMate 040). The preliminary results of this trial were promising, and that led to the FDA

## CD38 is a good predictor of anti-PD-1 immunotherapy responsiveness in HCC

77 granting accelerated approval of nivolumab treatment for HCC patients previously treated with  
78 sorafenib<sup>10, 11</sup>.

79 Current data showed phase I/II trials with response rates about 20%, and thus a number of different  
80 biomarkers that have been proposed to differentiate patients who will benefit from PD-1  
81 immunotherapy. In addition to PD-L1 expression as a biomarker for response to immunotherapy,<sup>12-14</sup>  
82 tumour mutation burden (TMB) and microsatellite instability (MSI) have also been proposed as  
83 predictive markers for immunotherapy, with these markers depicting the number of neoantigens in  
84 the tumour that would potentially be recognized by the immune system.<sup>15</sup> IFN $\gamma$  gene signature is also  
85 used to potentially discriminate responsiveness to PD-1 checkpoint blockade.<sup>16-19</sup> However, in HCC  
86 the use of PDL-1 – cut-off 1% on tumour cells has its limitations in predicting response.<sup>10</sup> Thus, there  
87 remains to be seen if there is any robust biomarker in HCC.

88 The tumour microenvironment (TME) has also become of interest to the field of immunotherapy.  
89 Under normal conditions, tissue homeostasis acts as barrier against tumour formation, with tumours  
90 altering the stromal components during their development and metastasis. The tumour  
91 microenvironment is hypoxic and immunosuppressive, and a multifunctional molecule called CD38  
92 is involved in this mechanism. CD38 structurally resembles CD1a and serves as an ectozyme in the  
93 adenosinergic pathway.<sup>20</sup> In hypoxic environments, NAD<sup>+</sup> is released by the salvage pathway and  
94 hydrolysed by CD38 to form adenosine diphosphate ribose. This is further degraded to adenosine  
95 monophosphate (AMP) through the CD38-CD203a-CD73 pathway. Following this, CD73  
96 dephosphorylates AMP to adenosine.<sup>21, 22</sup> Accumulated extracellular adenosine then binds to various  
97 receptors on a range of immune cells, impeding their infiltration and activation.<sup>23, 24</sup> This represents  
98 an alternative immunosuppressive mechanism to the PD-1/PD-L1 pathway. Inhibition of the  
99 adenosine pathway has been shown to weaken the intensity of immunosuppression in the TME.<sup>25</sup>  
100 Furthermore, reversal of hypoxia via oxygen supplementation in a murine model resulted in a

101 significant reduction in solid tumour growth and metastasis.<sup>26</sup> Similarly, co-treatment with PD-1  
102 blockade and adenosine receptor inhibitors has been found to improve immune cell responses and  
103 result in increased tumour suppression in various mouse models.<sup>27-29</sup>

104 Beside serving as a ectozyme, CD38 also functions as a surface membrane marker in various immune  
105 cells and non-lymphoid tissues.<sup>30</sup> The relevance of CD38 to HCC was established in a recent study  
106 by our group, where a correlation between CD38<sup>+</sup> tumour-infiltrating leukocyte (TIL) density and  
107 improved prognosis was found.<sup>31</sup> The expression of CD38 has been reported in a range of immune  
108 cell populations,<sup>30</sup> but data regarding macrophages and lymphocytes are limited.

109 In the present study, we confirmed the expression of CD38 on immune cells and tumours in HCC.  
110 Following this, we determined the relationship between CD38<sup>+</sup> leukocytes and lymphocytes and  
111 patient response to immunotherapy in a pilot, retrospective cohort of Asian HCC patients (n=20).

112

## 113 **2. Materials and Methods**

### 114 **2.1 Patients and tumours**

115 These were a total of 20 archival formalin-fixed, paraffin-embedded (FFPE) specimens taken from  
116 Asian patients with HCC undergoing immunotherapy between January 2015 and December 2018 at  
117 the Department of Medical Oncology, National Cancer Centre. Samples were all obtained prior to  
118 immunotherapy at the Department of Anatomical Pathology, Division of Pathology, Singapore  
119 General Hospital. Surgical resected samples or biopsy specimens were obtained prior to PD-1/PD-L1  
120 therapy. Tumours were staged and graded according to the BCLC staging<sup>32</sup> or AJCC staging  
121 system<sup>33</sup> and the Edmonson-Steiner grading system.<sup>34</sup> The Centralized Institutional Review Board of

## CD38 is a good predictor of anti-PD-1 immunotherapy responsiveness in HCC

122 SingHealth provided ethical approval for the use of patient materials in this study (CIRB ref:  
123 2014/590/B).

### 124 **2.2 Immunohistochemistry (IHC)**

125 IHC was performed on the FFPE tissue samples as previously described.<sup>35</sup> TMA sections of 4µm  
126 thickness were incubated with antibodies specific for CD8, CD38, CD68 and cell nucleus, as listed in  
127 Supplementary Table 1. Appropriate positive and negative controls were included. To generate the  
128 scoring of antibody-labeled sections, images were captured using an IntelliSite Ultra-Fast Scanner  
129 (Philips, Eindhoven, Netherlands). The percentage of leukocyte cells displaying unequivocal staining  
130 of any intensity for CD38 was determined by pathologists blinded to clinicopathological and survival  
131 information.

### 132 **2.3 mIF analysis of TMAs**

133 Multiplex immunofluorescence/immunohistochemistry (mIF or mIHC) was performed using an Opal  
134 Multiplex fiHC kit (PerkinElmer, Inc., Waltham, MA, USA), as previously described by our group  
135 and other studies.<sup>31, 36-47</sup> TMA sections (4 µm thick) were labelled with primary antibodies against  
136 CD38, CD8 and CD68, followed by appropriate secondary antibodies. All antibodies used are listed  
137 in Supplementary Table 1. This was followed by the application of a fluorophore-conjugated  
138 tyramide signal amplification buffer (PerkinElmer, Inc.) and the nuclear counterstain DAPI. A Vectra  
139 3 pathology imaging system microscope (PerkinElmer, Inc.) was used to obtain images, and these  
140 were analysed using inForm software (version 2.4.2; PerkinElmer, Inc.).<sup>48-51</sup>

### 141 **2.4 Validation, follow-up and statistical analysis**

142 Follow-up data were obtained from medical records. An unpaired, two-tailed Student's t-test was  
143 used to compare CD38 expression in patients with that was successfully treated by immunotherapy

144 and patients whom were not. The associations between clinicopathological parameters and the  
145 frequency of CD38<sup>+</sup> leukocytes were analysed using  $\chi^2$  and Fisher's exact tests. Statistical analysis  
146 was performed using RStudio 1.1.456 running R 3.5.0<sup>52, 53</sup> (R-core Team, R Foundation for  
147 Statistical Computing, Vienna, Austria) and GraphPad Prism 8.0.0 for Windows (GraphPad Software,  
148 Inc., San Diego, CA, USA) . P<0.05 was considered to indicate a statistically significant difference.

149

### 150 **3. Results**

#### 151 **3.1 Tumour, lymphocytes and macrophages express CD38, and macrophages represent the** 152 **largest CD38<sup>+</sup> immune cell subset in HCC**

153 We initially sought to verify the expression of CD38 by different immune infiltrates in the HCC  
154 samples. A high level of co-localisation between CD38 and CD68 expression was visualised under  
155 mIF/mIHC (Fig. 1A), indicating that CD38 is expressed in macrophages. CD38 was also expressed  
156 in CD8<sup>+</sup> lymphocytes (Fig. 1B), and in tumour cells (Fig. 1C). CD38 staining is seen on tumour cells  
157 for 2 out of 36 patients in IHC staining. DAPI Nucleus staining was used to identify the cells.  
158 Further analysis showed that expression of CD38<sup>+</sup> immune infiltrates in HCC were more in non-  
159 responders when compared to those who responded to anti-PD-1/PD-L1 treatment (Fig. 2).

#### 160 **3.2 CD38<sup>+</sup> immune infiltrates are associated with partial responsiveness to anti-PD-1** 161 **immunotherapy treatment in HCC**

162 We further assessed whether the presence of CD38<sup>+</sup> immune infiltrate subsets in specific locations  
163 affects the responsiveness of patients with HCC to nivolumab. In our study, the response criteria  
164 were classified as either response present (including complete and partial response) or no response  
165 (including both stable and progressive disease). The response criteria are determined according to the



## CD38 is a good predictor of anti-PD-1 immunotherapy responsiveness in HCC

166 RECIST 1.1 guidelines<sup>54</sup> with radiology review. The presence of CD38<sup>+</sup> immune infiltrate subsets  
167 within the tumour was strongly associated with a positive response to anti-PD-1 immunotherapy  
168 (responsive vs. non-responsive, 15.83±5.943% vs. 3.539±1.070%; p=0.0041; Fig. 3). Similarly,  
169 CD38<sup>+</sup> lymphocytes (responsive vs. non-responsive, 26.13±10.84% vs. 4.495±1.437%; p=0.0034)  
170 was also strongly associated with better responsiveness in anti-PD-1 therapy specifically, but not  
171 CD38<sup>+</sup> macrophages (responsive vs. non-responsive, 5.536±2.521% vs. 2.582±1.049%; p=0.2160).

### 172 **3.3 CD38<sup>+</sup> leukocyte and lymphocyte proportion is of strong predictive value of** 173 **responsiveness to treatment**

174 As shown in Fig. 4, the optimal cut-off for CD38<sup>+</sup> leukocyte proportion has been defined using  
175 receiver operating characteristic analysis. The cut-off used was 4.4% positive out of total immune  
176 infiltrates, and this cut-off achieved 75.0% accuracy, 73.3% specificity and 80.0% sensitivity. The  
177 area under curve (AUC) is 0.867. Similarly, the optimal cut-off for CD38<sup>+</sup> lymphocytes proportion  
178 was defined. The cut-off used was 7.5% positive out of total lymphocytes, and this cut-off was  
179 achieved 80.0% accuracy, 80.0% specificity and 80.0% sensitivity.

## 180 **4. Discussion**

181 Cancer immunotherapy is mechanistically different to other treatment modalities, such as cytotoxic  
182 therapies and small molecule inhibitors, as it targets the TME rather than the tumour itself. So far,  
183 minimal side effects have been identified, and the potential for application to different types of  
184 cancer seems particularly promising. However, the overall patient response rate to PD-1/PD-L1  
185 inhibitors remains unsatisfactory, limiting its application in clinical practice. This phenomenon may  
186 be the result of variability in the immune microenvironment between different cancers. Thus, further  
187 investigation of biomarkers is of the utmost importance to fully understand any associations with  
188 clinical outcomes, and identify patients most likely to benefit from treatment.

189 Multiple studies have demonstrated correlations between therapeutic response rates and PD-L1  
190 expression in tumours, which are likely due to the close relationship between PD-L1 and PD-1.  
191 Increased PD-L1 expression is generally believed to be associated with increased response rate and  
192 improved clinical benefit in PD-1 blockade therapy. However, the conclusions drawn from multiple  
193 trials have not always been consistent.<sup>55-60</sup> Thus, investigation of alternative immunosuppression  
194 pathways to PD-1/CTLA-4 is necessary. One such immunosuppressive mechanism proposed to be of  
195 relevance is the adenosinergic pathway, where extracellular adenosine exerts local  
196 immunosuppression through tumour-intrinsic and host-mediated mechanisms.

197 The adenosinergic pathway involves CD38, which is a multifunctional marker that is expressed in  
198 various regulatory cells, including myeloid-derived suppressor cells, mesenchymal stem cells and  
199 NK cells.<sup>61</sup> In a recent study, CD38 was found to be expressed by a subset of tumours with high  
200 levels of basal or treatment-induced infiltration.<sup>62</sup> In the present study, multiplex IHC revealed the  
201 expression of CD38 on the surface of both leukocytes and HCC tumour cells (Fig. 1), which is  
202 consistent with the current literature.<sup>30, 62</sup> Further previous studies have demonstrated that tumours  
203 treated with PD-1/PDL-1-specific antibodies develop treatment resistance through upregulation of  
204 CD38, which follows the release of all-trans retinoic acid and IFN $\beta$  in the TME. This results in the  
205 suppression of CD8<sup>+</sup> T cell function via the adenosine signalling pathway.<sup>62</sup> The role of adenosine in  
206 immune exhaustion and the observed expression of CD38 on immune infiltrates in the present study  
207 suggest the presence of a complex interplay between the inflammatory response and immune  
208 suppression via adenosine production. Thus, this immunosuppression mechanism may represent a  
209 promising target for immunotherapy.

210 Notably, the expression of CD38 was observed on macrophages in human HCC tumour samples.  
211 Previously, CD38 was found to be in macrophages isolated from mice<sup>63, 64</sup>, cell lines<sup>65</sup> and on human  
212 *ex vivo* experiments<sup>66</sup>, but there is not much direct evidence on CD38 expression on macrophages in

## CD38 is a good predictor of anti-PD-1 immunotherapy responsiveness in HCC

213 humans. This study confirmed that CD38 is expressed on tumour cells as well as multiple types of  
214 immune cells, including macrophages. Further analysis on CD38 expression established that  
215 responsiveness to immunotherapy is associated with higher levels of CD38<sup>+</sup> immune infiltrates  
216 within the TME. This is also true for CD38<sup>+</sup> lymphocytes levels within the microenvironment but the  
217 CD38<sup>+</sup> macrophages subset did not achieve significance (Fig. 3), suggesting a role of CD38<sup>+</sup>  
218 lymphocytes in affecting the response of immunotherapy. CD38 is shown to play an important role in  
219 lymphocyte activation.<sup>67</sup> Our lab's previous studies have ascertained the role of activated  
220 lymphocytes and CD38 in HCC prognosis,<sup>31</sup> and expression of CD38 in lymphocytes has been  
221 shown to be a marker in other cancers.<sup>68</sup> Considering the role of CD38 in the adenosine signaling  
222 pathway during hypoxia and the involvement of TILs in pro-inflammatory process, it is possible with  
223 anti-PD-1 immunotherapy, these CD38<sup>+</sup> lymphocytes are suppressed thereby allowing favourable  
224 therapeutic responses.

225 In addition to the usage of PD-1-specific antibodies to treat HCC, other trials have also investigated  
226 whether combination immunotherapy can be used to overcome tumour resistance. One such trial is a  
227 phase Ib randomised clinical study, evaluating the safety and efficacy of administrating the PD-L1-  
228 specific antibody atezolizumab with bevacizumab, which is a monoclonal antibody that targets  
229 VEGF, as a treatment for HCC. This is an on-going trial that is due for completion in 2021.<sup>69</sup>  
230 Potential future directions could include assessing the effects of CD38<sup>+</sup> leukocyte density on the  
231 response to combined immunotherapy.

232 As previously stated, despite an abundance of biomarkers were proposed as a biomarker for  
233 immunotherapy therapy in other cancers, it is yet to been seen if there has been any biomarker for  
234 HCC. Our paper has successful demonstrated that CD38<sup>+</sup> immune subsets or lymphocytes may also  
235 be useful as a biomarker to predict anti-PD-1 immunotherapy response. More studies are needed to  
236 confirm this phenomenon. Therefore, we propose to validate further by adopting CD38 IHC or

237 mIF/mIHC staining in clinical practice to identify these patients who will gain benefits remarkably  
238 by this adjunctive test as the implementation of personalised medicine.

239 Limitations of the present study include a limited sample size which should be a common limitation  
240 for anti-PD-1 immunotherapy study in HCC, but the predictive significance between responders and  
241 non-responders were substantial. Moreover, a proportion of our patient cohort received PD-1  
242 immunotherapy with another agent, making it a heterogenous population. However, this also reflects  
243 more closely to real life clinical practice, as most of the patients would receive combined therapy.  
244 Further studies may also be needed to investigate the effect of CD157 on response to anti-PD-1  
245 immunotherapy, as this is a CD38 paralogue. The two molecules possess dual receptorial and  
246 NADase functions, and CD157 is widely expressed across lymphoid tissues, including immune cells  
247 such as lymphocytes and macrophages.<sup>70</sup>

248 In conclusion, the present study established an association between CD38 expression and the  
249 response to anti-PD-1 immunotherapy in HCC. Future investigations will look to apply this to a  
250 larger cohort or outside Singapore, and make comparisons with a non-Asian cohort. The eventual aim  
251 is to apply these findings as a routine test in clinical practice, to identify patients suitable for  
252 immunotherapy.

253

## 254 **5. Declarations**

### 255 **5.1 Ethics approval and consent to participate**

256 The Centralized Institutional Review Board of SingHealth provided ethical approval for the use of  
257 patient materials in this study (CIRB ref: 2014/590/B).

### 258 **5.2 Conflict of Interest**

## **CD38 is a good predictor of anti-PD-1 immunotherapy responsiveness in HCC**

259 D.W.M.T. is in the advisory board in MSD for clinical trials, and as research support in BMS. F.M.  
260 received research support from Janssen Pharmaceuticals, Celgene, Tusk Therapeutics and Centrose,  
261 and served on advisory boards for Centrose, Tusk Therapeutics, Janssen, Takeda and Sanofi. The rest  
262 of the authors declare no conflicts of interest.

### **263 5.3 Funding**

264 This research was partially funded by the Centre Grant of Singapore General Hospital (grant no.  
265 NMRC/CG/M011/2017\_SGH, NMRC/CIRG/1454/2016) and the AM-ETHOS Duke-NUS Medical  
266 Student Fellowship Award (grant no. AM-ETHOS01/FY2018/10-A10).

### **267 5.4 Author Contributions**

268 JY and TL conceived, directed and supervised the study. HHMN and SG collated and interpreted the  
269 data and performed biostatistical analysis. XNS and JJHL constructed TMAs and performed IHC.  
270 HHMN and JY performed immunohistochemical scoring. FM, KS, CO, TL and WQL contributed to  
271 the scientific content of the study. DT, JLJX, SPC and HCT provided scientific inputs from  
272 Oncology perspectives. SYL and PC provided scientific inputs from Surgery perspectives. SG and  
273 HHMN drafted the manuscript with the assistance of JY, with final review from all authors.

### **274 5.5 Acknowledgements**

275 We thank the funding bodies such as the Centre Grant of Singapore General Hospital (grant no.  
276 NMRC/CG/M011/2017\_SGH, NMRC/CIRG/1454/2016) and the AM-ETHOS Duke-NUS Medical  
277 Student Fellowship Award (grant no. AM-ETHOS01/FY2018/10-A10). We also thank Dr. Alice  
278 Bridges, Dr. Lam Jianhang, Mr. Lim Chun Chye and Dr. Lim Tong Seng for critical review of the  
279 manuscript.

280

## 281 6. References

- 282 1. Global Burden of Disease Liver Cancer C, Akinyemiju T, Abera S, et al. The Burden of  
283 Primary Liver Cancer and Underlying Etiologies From 1990 to 2015 at the Global, Regional, and  
284 National Level: Results From the Global Burden of Disease Study 2015. *JAMA Oncol* 2017;3:1683-  
285 1691.
- 286 2. Zheng J, Chou JF, Gonen M, et al. Prediction of Hepatocellular Carcinoma Recurrence  
287 Beyond Milan Criteria After Resection: Validation of a Clinical Risk Score in an International  
288 Cohort. *Ann Surg* 2017;266:693-701.
- 289 3. Chen XP, Qiu FZ, Wu ZD, et al. Long-term outcome of resection of large hepatocellular  
290 carcinoma. *Br J Surg* 2006;93:600-6.
- 291 4. Ruan DY, Lin ZX, Wang TT, et al. Nomogram for preoperative estimation of long-term  
292 survival of patients who underwent curative resection with hepatocellular carcinoma beyond  
293 Barcelona clinic liver cancer stage A1. *Oncotarget* 2016;7:61378-61389.
- 294 5. Kudo M, Finn RS, Qin S, et al. Lenvatinib versus sorafenib in first-line treatment of patients  
295 with unresectable hepatocellular carcinoma: a randomised phase 3 non-inferiority trial. *Lancet*  
296 2018;391:1163-1173.
- 297 6. Llovet JM, Ricci S, Mazzaferro V, et al. Sorafenib in advanced hepatocellular carcinoma. *N*  
298 *Engl J Med* 2008;359:378-90.
- 299 7. Meyer T, Fox R, Ma YT, et al. Sorafenib in combination with transarterial  
300 chemoembolisation in patients with unresectable hepatocellular carcinoma (TACE 2): a randomised  
301 placebo-controlled, double-blind, phase 3 trial. *Lancet Gastroenterol Hepatol* 2017;2:565-575.
- 302 8. Zhang B, Zhou YL, Chen X, et al. Efficacy and safety of CTLA-4 inhibitors combined with  
303 PD-1 inhibitors or chemotherapy in patients with advanced melanoma. *Int Immunopharmacol*  
304 2019;68:131-136.
- 305 9. Gernerith G, Kocher F, Rudzki J, et al. ASCO 2018 NSCLC highlights-combination therapy  
306 is key. *Memo* 2018;11:266-271.
- 307 10. El-Khoueiry AB, Sangro B, Yau T, et al. Nivolumab in patients with advanced hepatocellular  
308 carcinoma (CheckMate 040): an open-label, non-comparative, phase 1/2 dose escalation and  
309 expansion trial. *Lancet* 2017;389:2492-2502.
- 310 11. Zhu AX, Finn RS, Edeline J, et al. Pembrolizumab in patients with advanced hepatocellular  
311 carcinoma previously treated with sorafenib (KEYNOTE-224): a non-randomised, open-label phase  
312 2 trial. *Lancet Oncol* 2018;19:940-952.
- 313 12. Grigg C, Rizvi NA. PD-L1 biomarker testing for non-small cell lung cancer: truth or fiction?  
314 *J Immunother Cancer* 2016;4:48.
- 315 13. Teixido C, Vilarino N, Reyes R, et al. PD-L1 expression testing in non-small cell lung cancer.  
316 *Ther Adv Med Oncol* 2018;10:1758835918763493.
- 317 14. Udall M, Rizzo M, Kenny J, et al. PD-L1 diagnostic tests: a systematic literature review of  
318 scoring algorithms and test-validation metrics. *Diagn Pathol* 2018;13:12.
- 319 15. Chang L, Chang M, Chang HM, et al. Microsatellite Instability: A Predictive Biomarker for  
320 Cancer Immunotherapy. *Appl Immunohistochem Mol Morphol* 2018;26:e15-e21.
- 321 16. Ayers M, Lunceford J, Nebozhyn M, et al. IFN-gamma-related mRNA profile predicts  
322 clinical response to PD-1 blockade. *J Clin Invest* 2017;127:2930-2940.
- 323 17. Cristescu R, Mogg R, Ayers M, et al. Pan-tumor genomic biomarkers for PD-1 checkpoint  
324 blockade-based immunotherapy. *Science* 2018;362.
- 325 18. Fehrenbacher L, Spira A, Ballinger M, et al. Atezolizumab versus docetaxel for patients with  
326 previously treated non-small-cell lung cancer (POPLAR): a multicentre, open-label, phase 2  
327 randomised controlled trial. *Lancet* 2016;387:1837-46.



## CD38 is a good predictor of anti-PD-1 immunotherapy responsiveness in HCC

- 328 19. Karachaliou N, Gonzalez-Cao M, Crespo G, et al. Interferon gamma, an important marker of  
329 response to immune checkpoint blockade in non-small cell lung cancer and melanoma patients. *Ther*  
330 *Adv Med Oncol* 2018;10:1758834017749748.
- 331 20. Vijayan D, Young A, Teng MWL, et al. Targeting immunosuppressive adenosine in cancer.  
332 *Nat Rev Cancer* 2017;17:709-724.
- 333 21. Horenstein AL, Chillemi A, Quarona V, et al. NAD(+)-Metabolizing Ectoenzymes in  
334 Remodeling Tumor-Host Interactions: The Human Myeloma Model. *Cells* 2015;4:520-37.
- 335 22. Vaisitti T, Audrito V, Serra S, et al. NAD+-metabolizing ecto-enzymes shape tumor-host  
336 interactions: the chronic lymphocytic leukemia model. *FEBS Lett* 2011;585:1514-20.
- 337 23. Ohta A. A Metabolic Immune Checkpoint: Adenosine in Tumor Microenvironment. *Front*  
338 *Immunol* 2016;7:109.
- 339 24. Stagg J, Smyth MJ. Extracellular adenosine triphosphate and adenosine in cancer. *Oncogene*  
340 2010;29:5346-58.
- 341 25. Ma SR, Deng WW, Liu JF, et al. Blockade of adenosine A2A receptor enhances CD8(+) T  
342 cells response and decreases regulatory T cells in head and neck squamous cell carcinoma. *Mol*  
343 *Cancer* 2017;16:99.
- 344 26. Hatfield SM, Kjaergaard J, Lukashev D, et al. Immunological mechanisms of the antitumor  
345 effects of supplemental oxygenation. *Sci Transl Med* 2015;7:277ra30.
- 346 27. Beavis PA, Divisekera U, Paget C, et al. Blockade of A2A receptors potently suppresses the  
347 metastasis of CD73+ tumors. *Proc Natl Acad Sci U S A* 2013;110:14711-6.
- 348 28. Mittal D, Young A, Stannard K, et al. Antimetastatic effects of blocking PD-1 and the  
349 adenosine A2A receptor. *Cancer Res* 2014;74:3652-8.
- 350 29. Waickman AT, Alme A, Senaldi L, et al. Enhancement of tumor immunotherapy by deletion  
351 of the A2A adenosine receptor. *Cancer Immunol Immunother* 2012;61:917-26.
- 352 30. Malavasi F, Deaglio S, Funaro A, et al. Evolution and function of the ADP ribosyl  
353 cyclase/CD38 gene family in physiology and pathology. *Physiol Rev* 2008;88:841-86.
- 354 31. Garnelo M, Tan A, Her Z, et al. Interaction between tumour-infiltrating B cells and T cells  
355 controls the progression of hepatocellular carcinoma. *Gut* 2017;66:342-351.
- 356 32. Llovet JM, Bru C, Bruix J. Prognosis of hepatocellular carcinoma: the BCLC staging  
357 classification. *Semin Liver Dis* 1999;19:329-38.
- 358 33. Henderson JM, Sherman M, Tavill A, et al. AHPBA/AJCC consensus conference on staging  
359 of hepatocellular carcinoma: consensus statement. *HPB (Oxford)* 2003;5:243-50.
- 360 34. Edmondson HA, Steiner PE. Primary carcinoma of the liver: a study of 100 cases among  
361 48,900 necropsies. *Cancer* 1954;7:462-503.
- 362 35. Chew V, Chen J, Lee D, et al. Chemokine-driven lymphocyte infiltration: an early  
363 intratumoural event determining long-term survival in resectable hepatocellular carcinoma. *Gut*  
364 2012;61:427-38.
- 365 36. Stack EC, Wang C, Roman KA, et al. Multiplexed immunohistochemistry, imaging, and  
366 quantitation: a review, with an assessment of Tyramide signal amplification, multispectral imaging  
367 and multiplex analysis. *Methods* 2014;70:46-58.
- 368 37. Abel EJ, Bauman TM, Weiker M, et al. Analysis and validation of tissue biomarkers for renal  
369 cell carcinoma using automated high-throughput evaluation of protein expression. *Hum Pathol*  
370 2014;45:1092-9.
- 371 38. Lovisa S, LeBleu VS, Tampe B, et al. Epithelial-to-mesenchymal transition induces cell cycle  
372 arrest and parenchymal damage in renal fibrosis. *Nat Med* 2015;21:998-1009.
- 373 39. Garnelo M, Tan A, Her Z, et al. Interaction between tumour-infiltrating B cells and T cells  
374 controls the progression of hepatocellular carcinoma. *Gut* 2015;15:2015-310814.

- 375 40. Yeong J, Thike AA, Lim JC, et al. Higher densities of Foxp3(+) regulatory T cells are  
376 associated with better prognosis in triple-negative breast cancer. *Breast Cancer Research and*  
377 *Treatment* 2017;163:21-35.
- 378 41. Lim JCT, Yeong, J. P. S., Lim, C. J., Ong, C. C. H., Chew, V. S. P., Ahmed, S. S., Tan, P. H.,  
379 & Iqbal, J. . An automated staining protocol for 7-colour immunofluorescence of human tissue  
380 sections for diagnostic and prognostic use. *Journal of The Royal College of Pathologists of*  
381 *Australasia* In Press.
- 382 42. Esbona K, Inman D, Saha S, et al. COX-2 modulates mammary tumor progression in  
383 response to collagen density. *Breast Cancer Research* 2016;18:35.
- 384 43. Mlecnik B, Bindea G, Kirilovsky A, et al. The tumor microenvironment and Immunoscore  
385 are critical determinants of dissemination to distant metastasis. *Science Translational Medicine*  
386 2016;8.
- 387 44. Nghiem PT, Bhatia S, Lipson EJ, et al. PD-1 Blockade with Pembrolizumab in Advanced  
388 Merkel-Cell Carcinoma. *New England Journal of Medicine* 2016;374:2542-2552.
- 389 45. Feng Z, Jensen SM, Messenheimer DJ, et al. Multispectral Imaging of T and B Cells in  
390 Murine Spleen and Tumor. *The Journal of Immunology* 2016;196:3943-3950.
- 391 46. Yeong J, Lim JCT, Lee B, et al. High Densities of Tumor-Associated Plasma Cells Predict  
392 Improved Prognosis in Triple Negative Breast Cancer. *Frontiers in Immunology* 2018;9.
- 393 47. Mazzaschi G, Madeddu D, Falco A, et al. Low PD-1 Expression in Cytotoxic CD8(+) Tumor-  
394 Infiltrating Lymphocytes Confers an Immune-Privileged Tissue Microenvironment in NSCLC with a  
395 Prognostic and Predictive Value. *Clin Cancer Res* 2018;24:407-419.
- 396 48. Yeong J, Lim JCT, Lee B, et al. Prognostic value of CD8 + PD-1+ immune infiltrates and  
397 PDCD1 gene expression in triple negative breast cancer. *J Immunother Cancer* 2019;7:34.
- 398 49. Fiore C, Bailey D, Conlon N, et al. Utility of multispectral imaging in automated quantitative  
399 scoring of immunohistochemistry. *Journal of Clinical Pathology* 2012;65:496-502.
- 400 50. Abel EJ, Bauman TM, Weiker M, et al. Analysis and validation of tissue biomarkers for renal  
401 cell carcinoma using automated high-throughput evaluation of protein expression. *Human Pathology*  
402 2014;45:1092-9.
- 403 51. Feng Z, Bethmann D, Kappler M, et al. Multiparametric immune profiling in HPV- oral  
404 squamous cell cancer. *JCI Insight* 2017;2.
- 405 52. RStudio: integrated development environment for R. Boston: RStudio, Inc, 2015.
- 406 53. R: a language and environment for statistical computing. Vienna: R Foundation for Statistical  
407 Computing, 2016.
- 408 54. Eisenhauer EA, Therasse P, Bogaerts J, et al. New response evaluation criteria in solid  
409 tumours: revised RECIST guideline (version 1.1). *Eur J Cancer* 2009;45:228-47.
- 410 55. Apolo AB, Infante JR, Balmanoukian A, et al. Avelumab, an Anti-Programmed Death-Ligand  
411 1 Antibody, In Patients With Refractory Metastatic Urothelial Carcinoma: Results From a  
412 Multicenter, Phase Ib Study. *J Clin Oncol* 2017;35:2117-2124.
- 413 56. Chow LQM, Haddad R, Gupta S, et al. Antitumor Activity of Pembrolizumab in Biomarker-  
414 Unselected Patients With Recurrent and/or Metastatic Head and Neck Squamous Cell Carcinoma:  
415 Results From the Phase Ib KEYNOTE-012 Expansion Cohort. *J Clin Oncol* 2016;34:3838-3845.
- 416 57. Sul J, Blumenthal GM, Jiang X, et al. FDA Approval Summary: Pembrolizumab for the  
417 Treatment of Patients With Metastatic Non-Small Cell Lung Cancer Whose Tumors Express  
418 Programmed Death-Ligand 1. *Oncologist* 2016;21:643-50.
- 419 58. Pai-Scherf L, Blumenthal GM, Li H, et al. FDA Approval Summary: Pembrolizumab for  
420 Treatment of Metastatic Non-Small Cell Lung Cancer: First-Line Therapy and Beyond. *Oncologist*  
421 2017;22:1392-1399.
- 422 59. Ikeda S, Okamoto T, Okano S, et al. PD-L1 Is Upregulated by Simultaneous Amplification of  
423 the PD-L1 and JAK2 Genes in Non-Small Cell Lung Cancer. *J Thorac Oncol* 2016;11:62-71.



## CD38 is a good predictor of anti-PD-1 immunotherapy responsiveness in HCC

- 424 60. Larkin J, Chiarion-Sileni V, Gonzalez R, et al. Combined Nivolumab and Ipilimumab or  
425 Monotherapy in Untreated Melanoma. *N Engl J Med* 2015;373:23-34.
- 426 61. Morandi F, Horenstein AL, Rizzo R, et al. The Role of Extracellular Adenosine Generation in  
427 the Development of Autoimmune Diseases. *Mediators Inflamm* 2018;2018:7019398.
- 428 62. Chen L, Diao L, Yang Y, et al. CD38-Mediated Immunosuppression as a Mechanism of  
429 Tumor Cell Escape from PD-1/PD-L1 Blockade. *Cancer Discov* 2018;8:1156-1175.
- 430 63. Kang J, Park KH, Kim JJ, et al. The role of CD38 in Fcγ receptor (FcγR)-  
431 mediated phagocytosis in murine macrophages. *J Biol Chem* 2012;287:14502-14.
- 432 64. Lischke T, Heesch K, Schumacher V, et al. CD38 controls the innate immune response  
433 against *Listeria monocytogenes*. *Infect Immun* 2013;81:4091-9.
- 434 65. Lee HC. Cyclic ADP-ribose and nicotinic acid adenine dinucleotide phosphate (NAADP) as  
435 messengers for calcium mobilization. *J Biol Chem* 2012;287:31633-40.
- 436 66. Amici SA, Young NA, Narvaez-Miranda J, et al. CD38 Is Robustly Induced in Human  
437 Macrophages and Monocytes in Inflammatory Conditions. *Front Immunol* 2018;9:1593.
- 438 67. Lund FE, Cockayne DA, Randall TD, et al. CD38: a new paradigm in lymphocyte activation  
439 and signal transduction. *Immunol Rev* 1998;161:79-93.
- 440 68. Xu L, Chen D, Lu C, et al. Advanced Lung Cancer Is Associated with Decreased Expression  
441 of Perforin, CD95, CD38 by Circulating CD3+CD8+ T Lymphocytes. *Ann Clin Lab Sci*  
442 2015;45:528-32.
- 443 69. ClinicalTrials.gov. A Study of the Safety and Efficacy of Atezolizumab Administered in  
444 Combination with Bevacizumab and/or Other Treatments in Participants With Solid Tumors. Volume  
445 2019, 2016.
- 446 70. Quarona V, Zaccarello G, Chillemi A, et al. CD38 and CD157: a long journey from activation  
447 markers to multifunctional molecules. *Cytometry B Clin Cytom* 2013;84:207-17.
- 448

### 449 7. Figure Legends

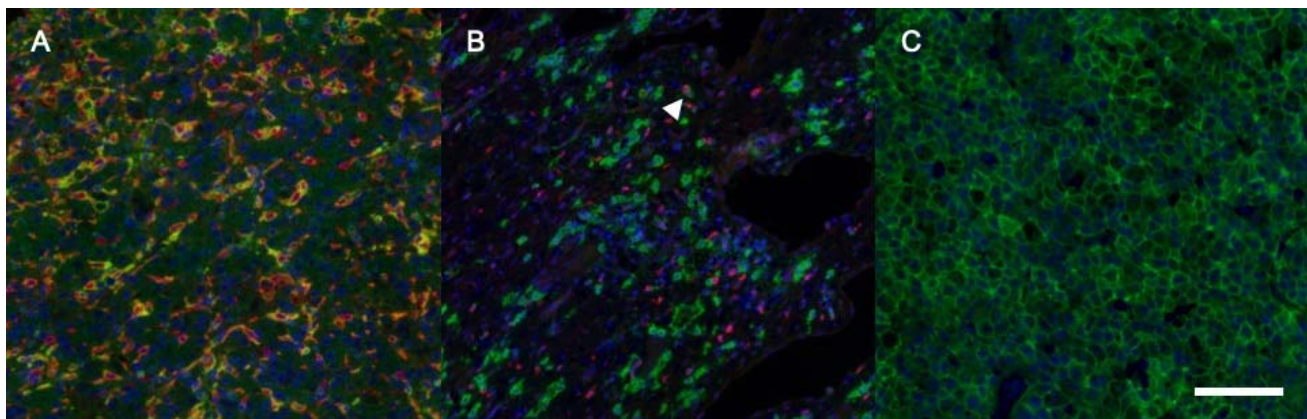

450

- 451 **Figure 1. Expression of CD38 in different cell types within formalin-fixed, paraffin-embedded**  
452 **HCC sections.** (A) Multiplex immunohistochemistry revealed that CD38 (green) is frequently co-  
453 localized with the macrophage marker CD68 (red) in the HCC tumour microenvironment. (B)  
454 Similar co-localization (white arrow) between CD38 (green) and CD8<sup>+</sup> lymphocytes (red) was also  
455 observed. (C) CD38 (green) is also expressed in HCC tumour cells. HCC, hepatocellular carcinoma.  
456 DAPI staining for cell nuclei (blue)

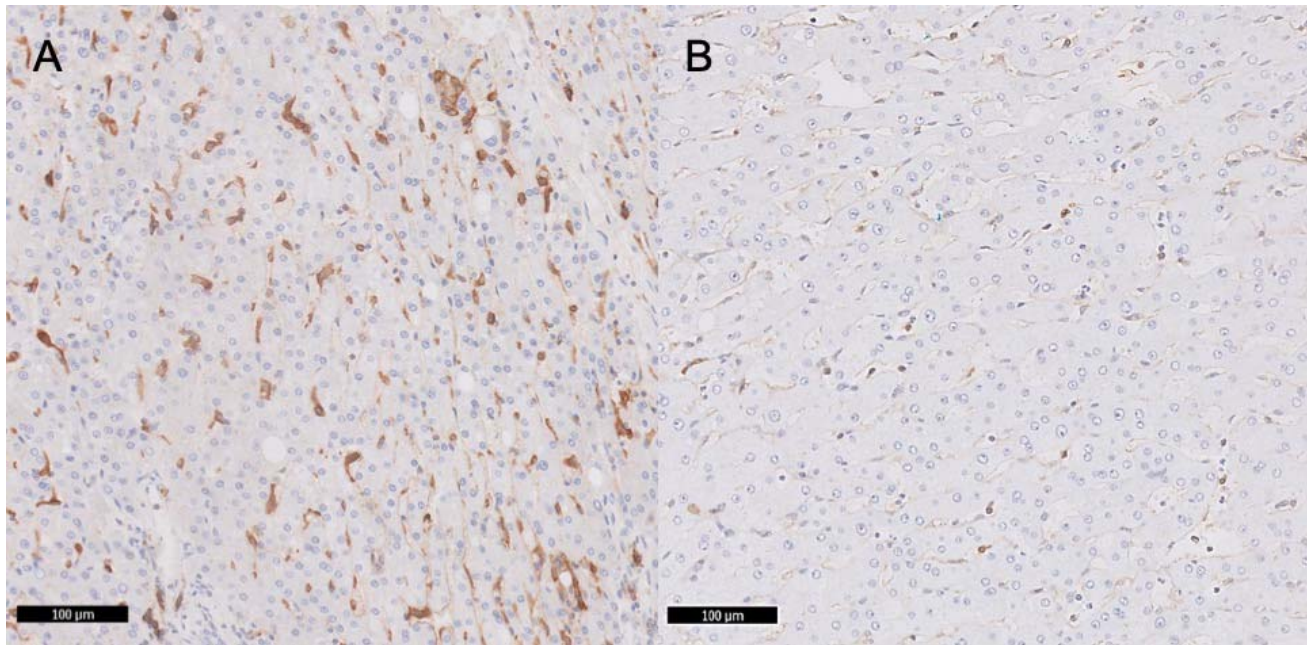

457

458 **Figure 2. The responders harboured more CD38<sup>+</sup> cells, compared to the non-responders of PD-**  
459 **1 treated HCC.** Respective CD38 immunohistochemistry staining showing (A) responders  
460 harboured more CD38<sup>+</sup> cells compared to the (B) non-responders.

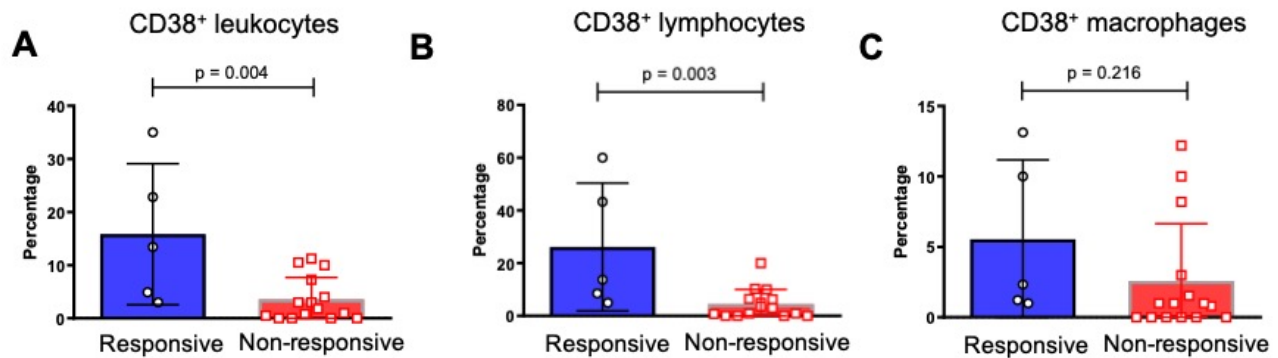

461

462 **Figure 3. Therapeutic response of HCC patients in relation to the CD38<sup>+</sup> immune infiltrate**  
463 **subsets.** (A) The percentage of CD38<sup>+</sup> immune infiltrate subsets within the tumour in responders and  
464 non-responders to anti-PD-1 immunotherapy. (B) The percentage of CD38<sup>+</sup> lymphocytes within the  
465 tumour in responders and non-responders to anti-PD-1 immunotherapy. (C) The percentage of CD38<sup>+</sup>  
466 macrophages within the tumour in responders and non-responders to anti-PD-1 immunotherapy. Data  
467 are presented as the mean ± standard error mean. (n = 20 formalin-fixed, paraffin-embedded samples).

## CD38 is a good predictor of anti-PD-1 immunotherapy responsiveness in HCC

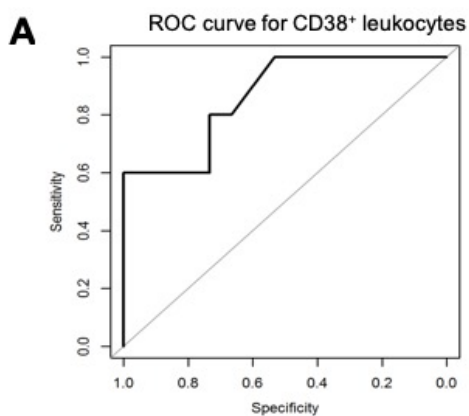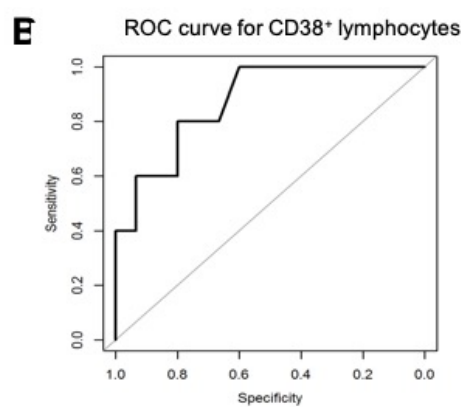

| Threshold | Specificity | Sensitivity | Accuracy | NPV   | PPV   |
|-----------|-------------|-------------|----------|-------|-------|
| 0.044     | 73.3%       | 80.0%       | 75.0%    | 91.7% | 50.0% |

| Threshold | Specificity | Sensitivity | Accuracy | NPV   | PPV   |
|-----------|-------------|-------------|----------|-------|-------|
| 0.075     | 80.0%       | 80.0%       | 80.0%    | 92.3% | 57.1% |

468

469 **Figure 4. Receiver operating characteristic curve for the ability of CD38<sup>+</sup> leukocyte and**  
470 **lymphocyte proportion to identify responders.** (A) CD38<sup>+</sup> leukocyte: AUC=0.867 (0.679, 1.000),  
471 (B) CD38<sup>+</sup> lymphocytes: AUC=0.873 (0.704, 1.000). Sensitivity refers to the proportion of true  
472 positive subjects with the disease among subjects with disease. Specificity refers to the proportion of  
473 true negative subjects without the disease among subjects without disease. PPV refers to the  
474 proportion of patients with positive results among subjects with positive results. NPV refers to the  
475 proportion of subjects without disease with a negative result among subjects with negative results.  
476 Accuracy refers to the proportion of subjects correctly classified among all subjects. AUC, area under  
477 the curve; PPV, positive predictive value, NPV, negative predictive value.

478
